# Supplementary figures and images for: Reaction of five-membered zirconacycloallenoids with the strong Lewis acid B(C6F5)3
Source: Royal Society of Chemistry journal article supplement (doi:10.1039/c4dt01137f), 2014-06-23

All text and images must be placed within the frame.

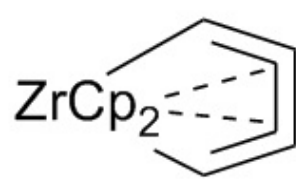

**3**

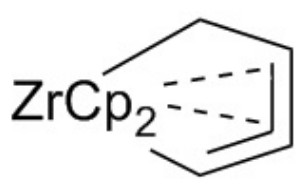

**4**

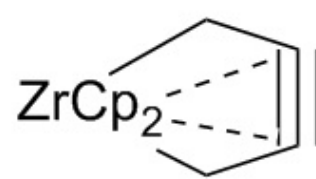

**5**

Supplement: c4dt01137f3.pdf [file c4dt01137f3.pdf]

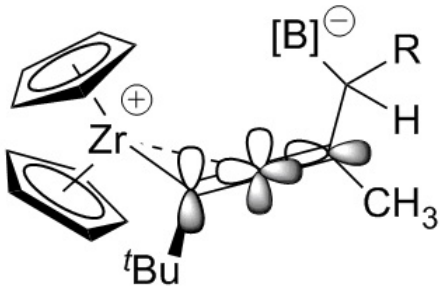

Supplement: c4dt01137f5.pdf [file c4dt01137f5.pdf]
